# Supplementary material
Source: PubMed Central journal article supplement (PMC7932129)
Supplement: NIHMS1673033-supplement-MIF180_SI_092419_pdf.pdf [file NIHMS1673033-supplement-MIF180_SI_092419_pdf.pdf]

## Supporting Information for

### Absolute Free Energy of Binding Calculations for Macrophage Migration Inhibitory Factor in Complex with a Drug-like Inhibitor

Yue Qian, Israel Cabeza de Vaca, Jonah Z. Vilseck, Daniel J. Cole, Julian Tirado-Rives and William L. Jorgensen\*

Department of Chemistry, Yale University, New Haven, Connecticut 06520-8107, United States

\*Corresponding author email: [william.jorgensen@yale.edu](mailto:william.jorgensen@yale.edu), phone: (203)432-6278

Keywords: Absolute Binding Free Energy, Monte Carlo, Molecular Dynamics, Force Field Evaluation, Benchmark System

---

|                                                                                             |    |
|---------------------------------------------------------------------------------------------|----|
| <b>Figure S1.</b> Atom Labelling for MIF180.                                                | S2 |
| <b>Figure S2.</b> Histograms of Hydrogen Bond Distances with Neutral N-terminal Proline.    | S3 |
| <b>Figure S3.</b> Histograms of Hydrogen Bond Distances with Protonated N-terminal Proline. | S4 |
| <b>Figure S4.</b> Bound State Free Energy Evolution for All LJ Windows (320 M/240 M).       | S5 |
| <b>Figure S5.</b> Electrostatic Potentials for MIF180 in the Four Force Fields used.        | S6 |
| <b>Tables S1.</b> Charge Comparison with Four Small Molecule Force Fields.                  | S7 |
| <b>Tables S2.</b> Average Hydrogen Bond Distances with Protonated N-terminal Proline.       | S9 |

---

**Figure S1.** Atom Labelling for MIF180.

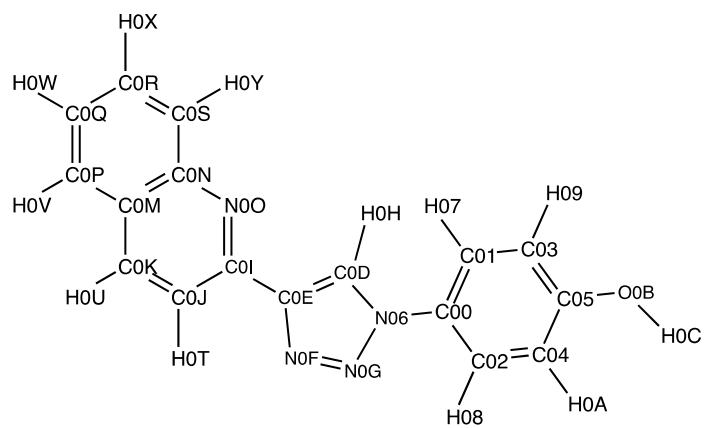

**Figure S2.** Histograms of the Hydrogen Bond Distances with Neutral N-terminal Proline: a) 1-r(OO); b) 2-r(NN); c) 3-r(NN); d) 4-r(NN); e) 5-r(NO).

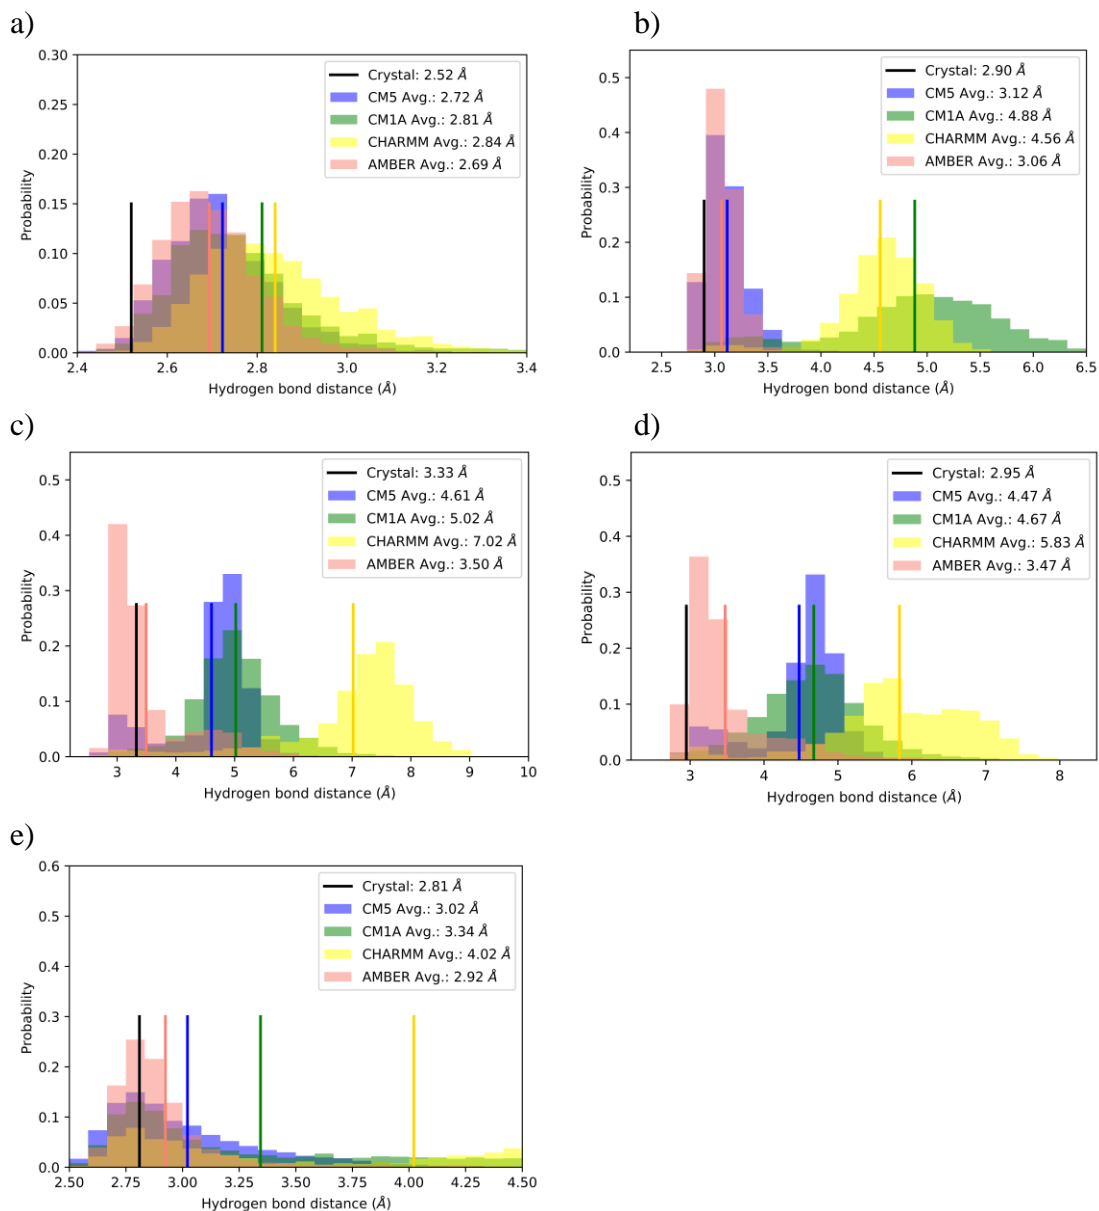

**Figure S3:** Histograms of the Hydrogen Bond Distances with Protonated N-terminal Proline: a) 1-r(OO); b) 2-r(NN); c) 3-r(NN); d) 4-r(NN); e) 5-r(NO).

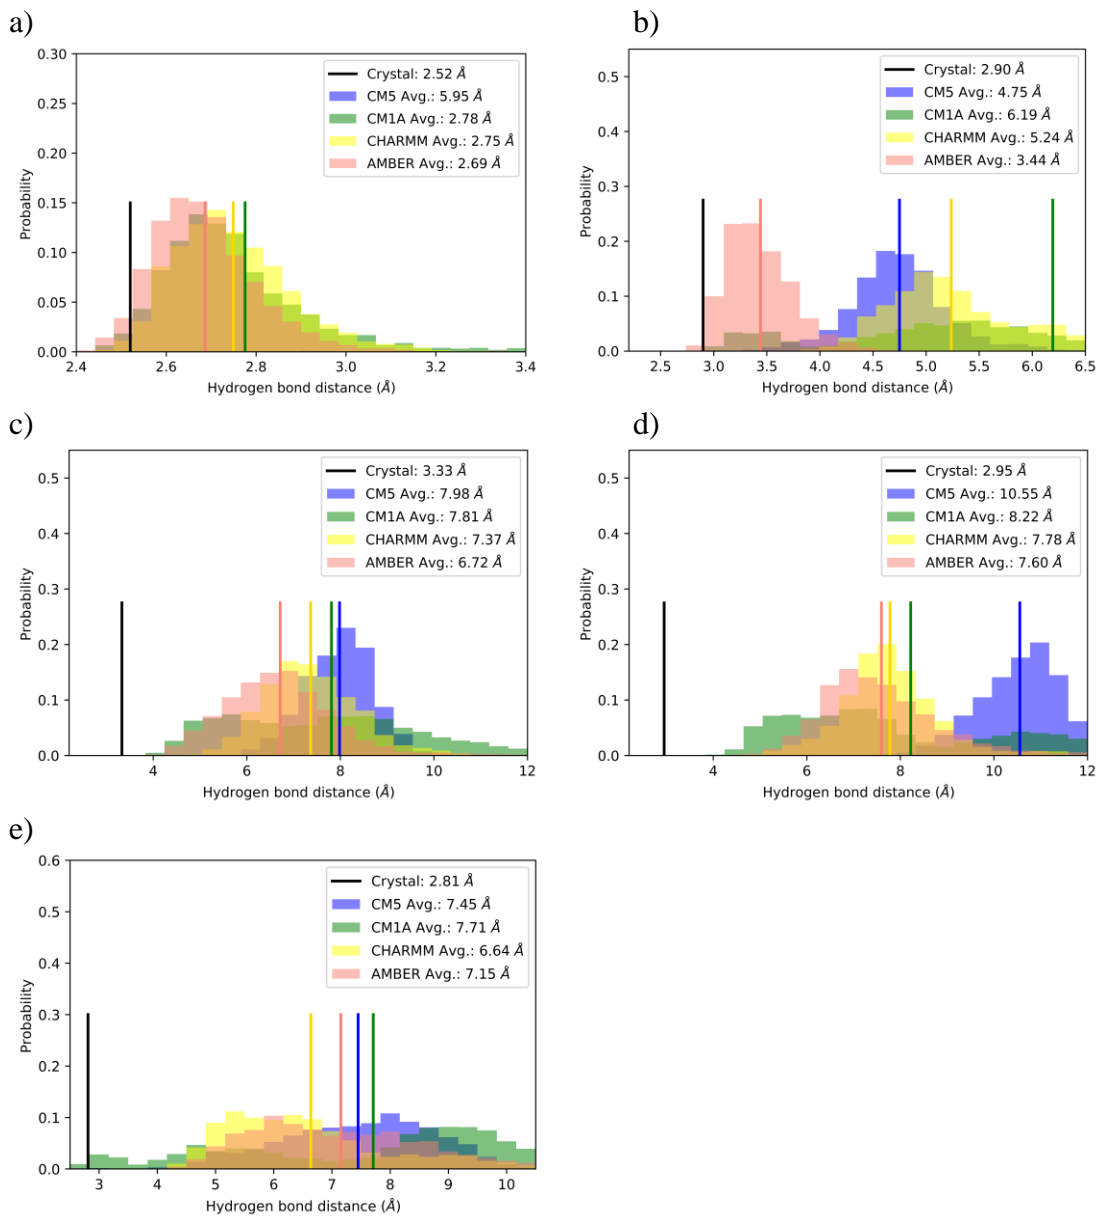

**Figure S4:** Bound State Free Energy Evolution for All LJ Windows (320 M/240 M).

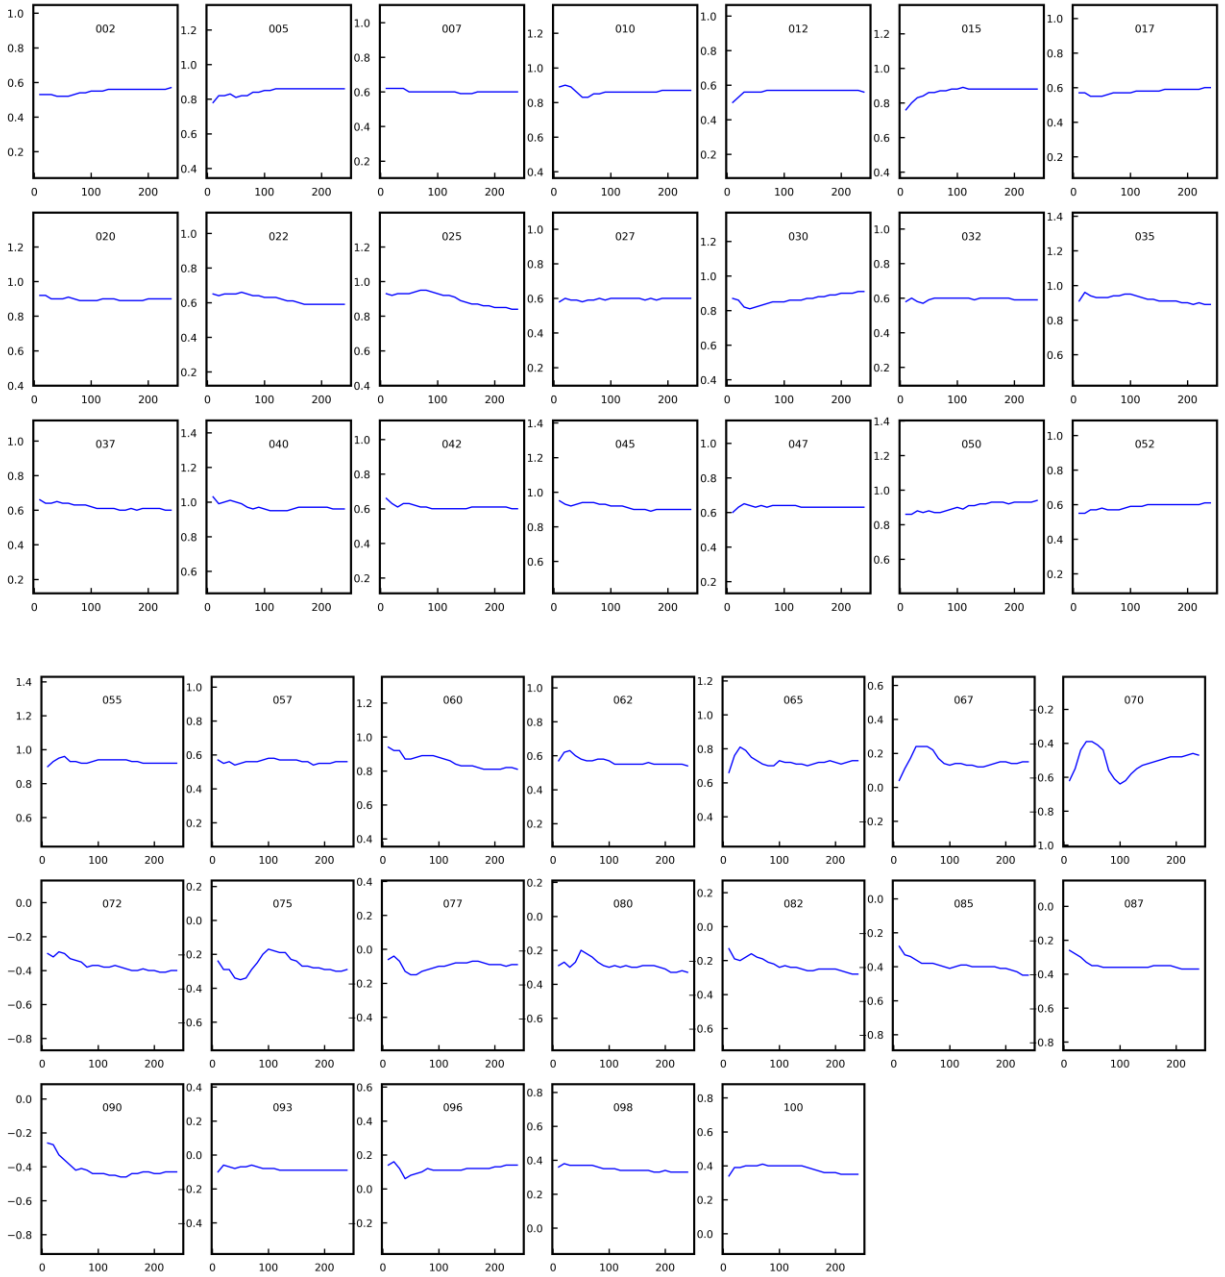

**Figure S5.** Electrostatic Potentials for MIF180 in The Four Force Fields used.

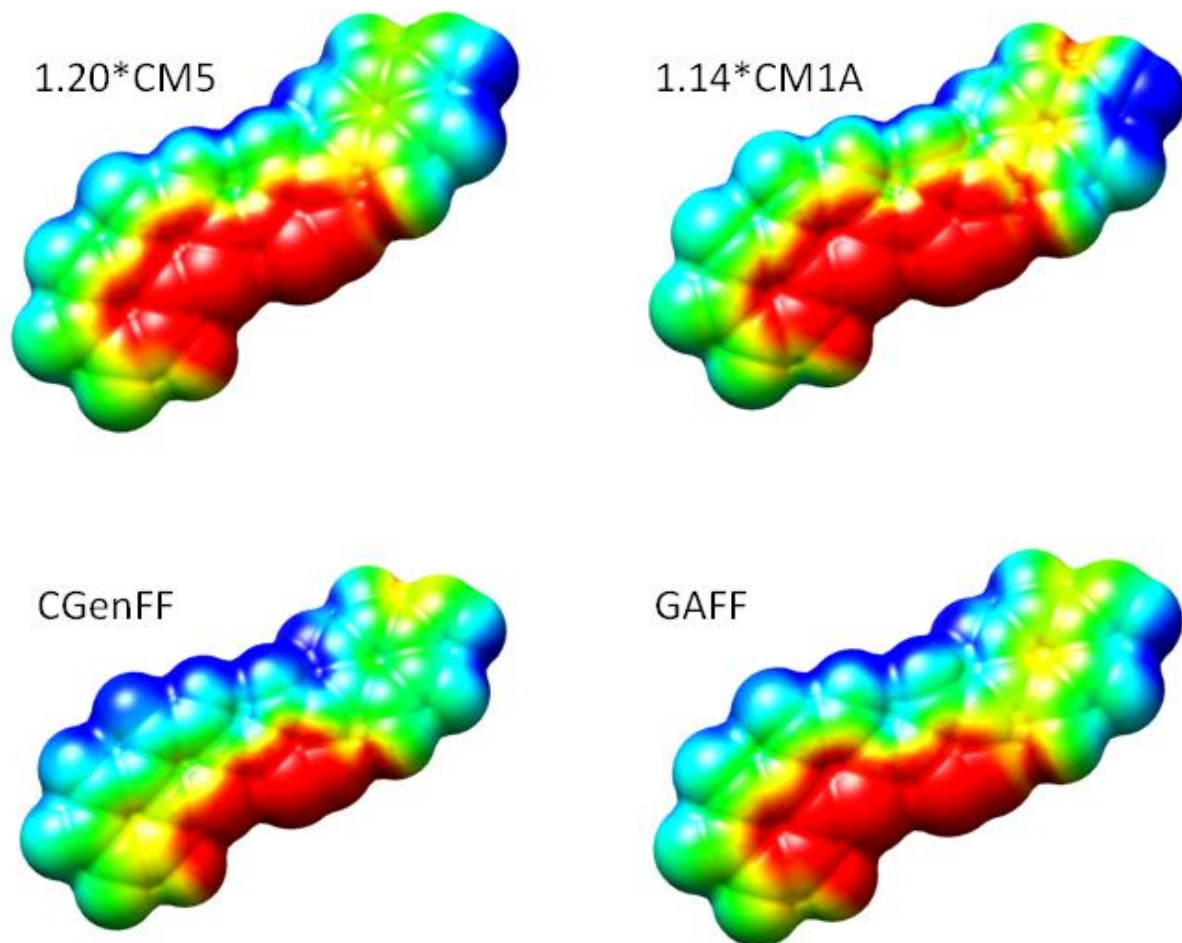

**Tables S1.** Charge Comparison with Four Small Molecule Force Fields.

| Atom number | Atom Name | 1.20*CM5 | 1.14*CM1A | CGenFF | GAFF   |
|-------------|-----------|----------|-----------|--------|--------|
| 1           | C00       | 0.112    | 0.060     | 0.087  | -0.026 |
| 2           | C01       | -0.108   | -0.094    | -0.113 | -0.090 |
| 3           | C02       | -0.108   | -0.094    | -0.113 | -0.090 |
| 4           | C03       | -0.131   | -0.204    | -0.112 | -0.174 |
| 5           | C04       | -0.131   | -0.204    | -0.112 | -0.174 |
| 6           | C05       | 0.109    | 0.156     | 0.108  | 0.129  |
| 7           | N06       | -0.181   | -0.293    | 0.499  | 0.117  |
| 8           | H07       | 0.139    | 0.173     | 0.115  | 0.154  |
| 9           | H08       | 0.139    | 0.173     | 0.115  | 0.154  |
| 10          | H09       | 0.139    | 0.171     | 0.115  | 0.151  |
| 11          | H0A       | 0.139    | 0.171     | 0.115  | 0.151  |
| 12          | O0B       | -0.496   | -0.504    | -0.530 | -0.491 |
| 13          | H0C       | 0.439    | 0.439     | 0.420  | 0.424  |
| 14          | C0D       | 0.032    | -0.065    | -0.443 | -0.160 |
| 15          | C0E       | 0.118    | -0.106    | 0.095  | 0.185  |
| 16          | N0F       | -0.248   | -0.113    | -0.408 | -0.338 |
| 17          | N0G       | -0.110   | 0.092     | -0.332 | -0.158 |
| 18          | H0H       | 0.165    | 0.220     | 0.259  | 0.208  |
| 19          | C0I       | 0.165    | 0.157     | 0.519  | 0.419  |
| 20          | C0J       | -0.122   | -0.199    | -0.119 | -0.219 |
| 21          | C0K       | -0.087   | -0.082    | -0.110 | -0.086 |
| 22          | C0M       | -0.019   | -0.086    | -0.004 | -0.148 |
| 23          | C0N       | 0.141    | 0.064     | 0.345  | 0.404  |
| 24          | N0O       | -0.418   | -0.248    | -0.625 | -0.676 |

---

|            |     |        |        |        |        |
|------------|-----|--------|--------|--------|--------|
| 25         | C0P | -0.117 | -0.129 | -0.113 | -0.109 |
| 26         | C0Q | -0.123 | -0.139 | -0.116 | -0.129 |
| 27         | C0R | -0.117 | -0.136 | -0.113 | -0.123 |
| 28         | C0S | -0.101 | -0.115 | -0.119 | -0.168 |
| 29         | H0T | 0.130  | 0.160  | 0.115  | 0.165  |
| 30         | H0U | 0.132  | 0.151  | 0.115  | 0.141  |
| 31         | H0V | 0.122  | 0.145  | 0.115  | 0.135  |
| 32         | H0W | 0.130  | 0.156  | 0.115  | 0.135  |
| 33         | H0X | 0.133  | 0.159  | 0.115  | 0.135  |
| 34         | H0Y | 0.134  | 0.168  | 0.115  | 0.147  |
| Net Charge | /   | 0.00   | 0.00   | 0.00   | 0.00   |

---



**Tables S2.** Average Hydrogen Bond Distances with Protonated N-terminal Proline (Å).

|         | Crystal | OPLS/<br>CM5 | OPLS/<br>CM1A | CHARMM/<br>CGenFF | AMBER/<br>GAFF |
|---------|---------|--------------|---------------|-------------------|----------------|
| 1-r(OO) | 2.52    | 5.95         | 2.78          | 2.75              | 2.69           |
| 2-r(NN) | 2.90    | 4.75         | 6.19          | 5.24              | 3.44           |
| 3-r(NN) | 3.33    | 7.98         | 7.81          | 7.37              | 6.72           |
| 4-r(NN) | 2.95    | 10.55        | 8.22          | 7.78              | 7.60           |
| 5-r(NO) | 2.81    | 7.45         | 7.71          | 6.64              | 7.15           |
